# Supplementary material for: Computational State Space Models for Activity and Intention Recognition. A Feasibility Study
Source: PubMed Central journal article supplement (PMC4220990; doi:10.1371/journal.pone.0109381), 2014-11-05
Supplement: pone.0109381.s013.pdf [file pone.0109381.s013.pdf]

**Table S1.** Task script and  $f_h$  distance values.

| Step | $f_h$ | Task                            | State predicate if task not fulfilled                |
|------|-------|---------------------------------|------------------------------------------------------|
| 1    | 14    | Clean hands                     | – (no state predicate with lower step count matches) |
| 2    | 13    | Get food to sink                | not clean food, holds food, not at sink              |
| 3    | 12    | Clean food                      | not clean food, holds food, at sink                  |
| 4    | 11    | Cut food                        | clean food, not food prepared                        |
| 5    | 10    | Turn stove on                   | food prepared, not cooked, stove off                 |
| 6    | 9     | Cook food                       | food prepared, not cooked, stove on                  |
| 7    | 8     | Turn oven off                   | hungry, cooked, stove on                             |
| 8    | 7     | Finish setting table & Sit down | hungry, cooked, stove off, not seated                |
| 9    | 6     | Enjoy meal                      | hungry, stove off, seated                            |
| 10   | 5     | Get up                          | not hungry, seated                                   |
| 11   | 4     | clean kitchen utensil (ku)      | not hungry, not seated, 4 ku dirty                   |
| 12   | 3     | clean ku                        | not hungry, not seated, 3 ku dirty                   |
| 13   | 2     | clean ku                        | not hungry, not seated, 2 ku dirty                   |
| 14   | 1     | clean ku                        | not hungry, not seated, 1 ku dirty                   |
| 15   | 0     | done                            |                                                      |
