# Supplementary material for: Computational State Space Models for Activity and Intention Recognition. A Feasibility Study
Source: PubMed Central journal article supplement (PMC4220990; doi:10.1371/journal.pone.0109381), 2014-11-05
Supplement: pone.0109381.s014.pdf [file pone.0109381.s014.pdf]

**Table S2.** Basic properties of observed action sequences.

|             | S1   | S2  | S3   | S4  | S5  | S6   | S7  | $M$   | $SD$   | $W$  | $p$  |
|-------------|------|-----|------|-----|-----|------|-----|-------|--------|------|------|
| Steps       | 89   | 91  | 96   | 96  | 82  | 95   | 92  | 91.6  | 5.00   | 0.87 | 0.18 |
| Plan.Length | 77   | 77  | 79   | 87  | 66  | 82   | 81  | 78.4  | 6.48   | 0.91 | 0.42 |
| Frames      | 1028 | 903 | 1032 | 634 | 909 | 1205 | 936 | 949.6 | 174.06 | 0.93 | 0.57 |
| Duration    | 274  | 241 | 275  | 169 | 242 | 321  | 250 | 253.2 | 46.42  | 0.93 | 0.57 |

Steps: number of actions in sequence (641 in total), Plan.Length (549 in total) ignores actions without effect (“wait”). Frames, Duration: sequence duration in frames (6647 in total) and seconds.  $W$ ,  $p$ : statistic and  $p$ -value for Shapiro-Wilk normality test ( $H_0 =$  data has normal distribution,  $n = 7$ ). There is no significant correlation between temporal length of an action sequence (Duration) and the number of action it contains (Steps) (Pearson’s  $\rho$ ,  $p = .98$ ). Use of Pearson’s  $\rho$  justified by normality of data, cf. results of Shapiro-Wilk tests.
