# Supplementary material for: Computational State Space Models for Activity and Intention Recognition. A Feasibility Study
Source: PubMed Central journal article supplement (PMC4220990; doi:10.1371/journal.pone.0109381), 2014-11-05
Supplement: pone.0109381.s015.pdf [file pone.0109381.s015.pdf]

**Table S3.** Action sequence of subject S1 (aLTS annotations).

| Step | Time | Action                           | Step | Time | Action                 |
|------|------|----------------------------------|------|------|------------------------|
| 1    | 0    | wash hands                       | 46   | 511  | sit-down               |
| 2    | 35   | wait                             | 47   | 536  | take spoon plate       |
| 3    | 43   | move sink counter                | 48   | 541  | eat                    |
| 4    | 64   | take food counter                | 49   | 616  | put spoon plate        |
| 5    | 70   | move counter sink                | 50   | 619  | take glass table       |
| 6    | 77   | wash food                        | 51   | 624  | drink                  |
| 7    | 111  | move sink counter                | 52   | 631  | wait                   |
| 8    | 117  | take knife counter               | 53   | 638  | drink                  |
| 9    | 122  | put food cutting-board           | 54   | 647  | put glass table        |
| 10   | 126  | cut food                         | 55   | 653  | take spoon plate       |
| 11   | 173  | put knife counter                | 56   | 657  | eat                    |
| 12   | 177  | wait                             | 57   | 692  | put spoon plate        |
| 13   | 184  | take knife+cutting-board counter | 58   | 699  | take plate+glass table |
| 14   | 191  | fill food cutting-board pot      | 59   | 705  | stand-up               |
| 15   | 204  | put knife+cutting-board counter  | 60   | 710  | move table sink        |
| 16   | 211  | take pot counter                 | 61   | 724  | wait                   |
| 17   | 219  | put pot stove                    | 62   | 729  | put glass sink         |
| 18   | 228  | wait                             | 63   | 735  | wait                   |
| 19   | 230  | turn-on stove                    | 64   | 759  | put plate sink         |
| 20   | 235  | wait                             | 65   | 767  | take sponge sink       |
| 21   | 247  | take wooden-spoon counter        | 66   | 773  | take spoon plate       |
| 22   | 256  | cook                             | 67   | 777  | wash spoon             |
| 23   | 334  | put wooden-spoon pot             | 68   | 797  | wait                   |
| 24   | 336  | turn-off stove                   | 69   | 809  | wash spoon             |
| 25   | 341  | wait                             | 70   | 816  | put spoon sink         |
| 26   | 349  | open cupboard                    | 71   | 822  | take plate sink        |
| 27   | 360  | take plate+glass cupboard        | 72   | 825  | wash plate             |
| 28   | 376  | put plate+glass counter          | 73   | 874  | put plate sink         |
| 29   | 389  | take pot stove                   | 74   | 881  | take glass sink        |
| 30   | 395  | fill food pot plate              | 75   | 884  | wash glass             |
| 31   | 416  | put pot stove                    | 76   | 919  | put glass sink         |
| 32   | 422  | wait                             | 77   | 926  | put sponge sink        |
| 33   | 427  | take bottle counter              | 78   | 929  | move sink counter      |
| 34   | 433  | open bottle                      | 79   | 935  | take pot stove         |
| 35   | 441  | fill water bottle glass          | 80   | 939  | move counter sink      |
| 36   | 453  | close bottle                     | 81   | 943  | put pot sink           |
| 37   | 463  | put bottle counter               | 82   | 946  | take wooden-spoon pot  |
| 38   | 467  | wait                             | 83   | 948  | take sponge sink       |
| 39   | 469  | take plate counter               | 84   | 950  | wash wooden-spoon      |
| 40   | 474  | wait                             | 85   | 964  | put wooden-spoon sink  |
| 41   | 481  | take spoon counter               | 86   | 970  | take pot sink          |
| 42   | 485  | put spoon plate                  | 87   | 973  | wash pot               |
| 43   | 488  | take glass counter               | 88   | 1020 | put pot sink           |
| 44   | 491  | move counter table               | 89   | 1027 | put sponge sink        |
| 45   | 506  | put plate+glass table            | 90   | 1028 | (done)                 |
