# Supplementary material for: Computational State Space Models for Activity and Intention Recognition. A Feasibility Study
Source: PubMed Central journal article supplement (PMC4220990; doi:10.1371/journal.pone.0109381), 2014-11-05
Supplement: pone.0109381.s016.pdf [file pone.0109381.s016.pdf]

**Table S4.** Domain objects and slots

|               | available | clean | cooked | filled | hungry | location | on | open | prepared | seated | thirsty |
|---------------|-----------|-------|--------|--------|--------|----------|----|------|----------|--------|---------|
| bottle        |           |       |        |        |        | •        |    | •    |          |        |         |
| cupboard      |           |       |        |        |        |          |    | •    |          |        |         |
| cutting_board |           |       |        |        |        | •        |    |      |          |        |         |
| food          |           | •     | •      |        |        | •        |    |      | •        |        |         |
| glass         |           | •     |        | •      |        | •        |    |      |          |        |         |
| hands         | •         | •     |        |        |        |          |    |      |          |        |         |
| knife         |           |       |        |        |        | •        |    |      |          |        |         |
| plate         |           | •     |        |        |        | •        |    |      |          |        |         |
| pot           |           | •     |        |        |        | •        |    |      |          |        |         |
| self          |           |       |        |        | •      | •        |    |      |          | •      | •       |
| sponge        |           |       |        |        |        | •        |    |      |          |        |         |
| spoon         |           | •     |        |        |        | •        |    |      |          |        |         |
| stir_spoon    |           | •     |        |        |        | •        |    |      |          |        |         |
| stove         |           |       |        |        |        |          | •  |      |          |        |         |

The domain objects and their slots are given in Tbl. S4. All slots have boolean value domains with two exceptions:

- $\text{available}(\text{hands})$  is an integer. The actions implement the constraint  $0 \leq \text{available}(\text{hands}) \leq 2$ .
- $\text{location}(\text{object})$  is a symbolic value. Allowed values for the different objects are given in Tbl. S5 (these constraints are again implemented by the actions).
