# Supplementary material for: Computational State Space Models for Activity and Intention Recognition. A Feasibility Study
Source: PubMed Central journal article supplement (PMC4220990; doi:10.1371/journal.pone.0109381), 2014-11-05
Supplement: pone.0109381.s017.pdf [file pone.0109381.s017.pdf]

**Table S5.** Value domains of location slot by domain object. (1152000 potential combinations)

|               | counter | cupboard | cutting_board | hands | plate | stove | pot | sink | table | void | # locations |
|---------------|---------|----------|---------------|-------|-------|-------|-----|------|-------|------|-------------|
| bottle        | •       |          |               | •     |       |       |     |      |       |      | 2           |
| cutting_board | •       |          |               | •     |       |       |     |      |       |      | 2           |
| food          | •       |          | •             | •     | •     |       | •   |      |       | •    | 6           |
| glass         | •       | •        |               | •     |       |       |     | •    | •     |      | 5           |
| knife         | •       |          |               | •     |       |       |     | •    | •     |      | 4           |
| plate         | •       | •        |               | •     |       |       |     | •    | •     |      | 5           |
| pot           | •       |          |               | •     |       | •     |     | •    |       |      | 4           |
| self          | •       |          |               |       |       |       |     | •    | •     |      | 3           |
| stir_spoon    | •       |          |               | •     |       |       | •   | •    |       |      | 4           |
| sponge        |         |          |               | •     |       |       |     | •    |       |      | 2           |
| spoon         | •       |          |               | •     | •     |       |     | •    | •     |      | 5           |
