# Supplementary material for: Computational State Space Models for Activity and Intention Recognition. A Feasibility Study
Source: PubMed Central journal article supplement (PMC4220990; doi:10.1371/journal.pone.0109381), 2014-11-05
Supplement: pone.0109381.s019.pdf [file pone.0109381.s019.pdf]

**Table S7.** Duration models selected for action classes

| Class    | $n$ | Model     | LL      | $D$  | $p$    |
|----------|-----|-----------|---------|------|--------|
| Base     | 143 | lognormal | -410.61 | 0.07 | 0.5254 |
| COOK     | 9   | weibull   | -44.10  | 0.27 | 0.4367 |
| CUT      | 7   | gamma     | -32.36  | 0.18 | 0.9512 |
| DRINK    | 11  | weibull   | -21.55  | 0.21 | 0.6531 |
| EAT      | 13  | lognormal | -59.49  | 0.20 | 0.5962 |
| FILL     | 21  | weibull   | -62.79  | 0.19 | 0.4025 |
| MOVE     | 54  | lognormal | -162.58 | 0.08 | 0.8349 |
| PUT      | 162 | lognormal | -355.67 | 0.15 | 0.0015 |
| STAND_UP | 7   | weibull   | -10.01  | 0.19 | 0.9153 |
| TAKE     | 165 | lognormal | -358.01 | 0.14 | 0.0027 |
| WASH     | 49  | gamma     | -207.42 | 0.08 | 0.8985 |
