# Supplementary material for: Computational State Space Models for Activity and Intention Recognition. A Feasibility Study
Source: PubMed Central journal article supplement (PMC4220990; doi:10.1371/journal.pone.0109381), 2014-11-05
Supplement: pone.0109381.s020.pdf [file pone.0109381.s020.pdf]

**Table S8.** Comparing performance of different CSSM model configurations to HMM model.

| Duration              | Distance                        | Mode      | $t$  | $p_t$  | $M_t$ | $V$ | $p_V$ | $M_V$ | $p_{SW}$ |
|-----------------------|---------------------------------|-----------|------|--------|-------|-----|-------|-------|----------|
| $\tau_c$ (continuous) | $f_\delta$ (complete)           | Forward   | 3.14 | .02    | .037  | 27  | .031  | .036  | .043     |
| $\tau_d$ (discrete)   | $f_\delta$ (complete)           | Forward   | 7.87 | < .001 | .067  | 28  | .016  | .07   | .14      |
| $\tau_c$ (continuous) | $f_{\bar{\delta}}$ (restricted) | Forward   | 5.78 | .001   | .066  | 28  | .016  | .069  | .12      |
| $\tau_d$ (discrete)   | $f_{\bar{\delta}}$ (restricted) | Forward   | 9.37 | < .001 | .098  | 28  | .016  | .11   | .081     |
| $\tau_c$ (continuous) | $f_h$ (script)                  | Forward   | 3.61 | .011   | .043  | 27  | .031  | .042  | .43      |
| $\tau_d$ (discrete)   | $f_h$ (script)                  | Forward   | 7.67 | < .001 | .064  | 28  | .016  | .064  | .79      |
| $\tau_c$ (continuous) | $f_\delta$ (complete)           | Smoothing | 6.75 | < .001 | .063  | 28  | .016  | .068  | .078     |
| $\tau_d$ (discrete)   | $f_\delta$ (complete)           | Smoothing | 6.70 | < .001 | .083  | 28  | .016  | .087  | .12      |
| $\tau_c$ (continuous) | $f_{\bar{\delta}}$ (restricted) | Smoothing | 6.71 | < .001 | .082  | 28  | .016  | .087  | .16      |
| $\tau_d$ (discrete)   | $f_{\bar{\delta}}$ (restricted) | Smoothing | 5.88 | .001   | .1    | 28  | .016  | .11   | .27      |
| $\tau_c$ (continuous) | $f_h$ (script)                  | Smoothing | 7.14 | < .001 | .06   | 28  | .016  | .064  | .12      |
| $\tau_d$ (discrete)   | $f_h$ (script)                  | Smoothing | 6.27 | < .001 | .08   | 28  | .016  | .092  | .044     |

Comparing performance of different CSSM model configurations to HMM model, using paired  $t$ -test and Wilcoxon signed rank tests (CM, O21s, L1). For all  $t$ -tests,  $df = 6$ .  $p_{SW}$  gives the p-value for the Shapiro-Wilk normality test.
