# Supplementary material for: Computational State Space Models for Activity and Intention Recognition. A Feasibility Study
Source: PubMed Central journal article supplement (PMC4220990; doi:10.1371/journal.pone.0109381), 2014-11-05
Supplement: pone.0109381.s021.pdf [file pone.0109381.s021.pdf]

**Table S9.** Significance of effects of CSSM configuration factors on Accuracy

| Effect                                     | $F$ value             | $p$ value | $\eta_G^2$ |       |   |
|--------------------------------------------|-----------------------|-----------|------------|-------|---|
| Mode                                       | $F_{(1,6)} = 168.93$  | < .001    | *          | .34   | * |
| Observations                               | $F_{(2,12)} = 34.51$  | < .001    | *          | .61   | * |
| Distance                                   | $F_{(2,12)} = 23.23$  | < .001    | *          | .14   | * |
| Weight                                     | $F_{(5,30)} = 39.25$  | < .001    | *          | .18   | * |
| Duration                                   | $F_{(1,6)} = 1.76$    | .23       |            | .004  |   |
| Mode:Observations                          | $F_{(2,12)} = 79.17$  | < .001    | *          | .24   | * |
| Mode:Distance                              | $F_{(2,12)} = 13.68$  | < .001    | *          | .033  |   |
| Observations:Distance                      | $F_{(4,24)} = 3.34$   | .026      | *          | .03   |   |
| Mode:Weight                                | $F_{(5,30)} = 19.65$  | < .001    | *          | .089  | * |
| Observations:Weight                        | $F_{(10,60)} = 13.46$ | < .001    | *          | .079  | * |
| Distance:Weight                            | $F_{(10,60)} = 20.39$ | < .001    | *          | .1    | * |
| Mode:Duration                              | $F_{(1,6)} = 1.63$    | .25       |            | .001  |   |
| Observations:Duration                      | $F_{(2,12)} = 10.48$  | .002      | *          | .025  |   |
| Distance:Duration                          | $F_{(2,12)} = 0.65$   | .54       |            | .002  |   |
| Weight:Duration                            | $F_{(5,30)} = 4.67$   | .003      | *          | .015  |   |
| Mode:Observations:Distance                 | $F_{(4,24)} = 5.32$   | .003      | *          | .008  |   |
| Mode:Observations:Weight                   | $F_{(10,60)} = 2.62$  | .01       | *          | .013  |   |
| Mode:Distance:Weight                       | $F_{(10,60)} = 22.30$ | < .001    | *          | .077  | * |
| Observations:Distance:Weight               | $F_{(20,120)} = 2.49$ | .001      | *          | .018  |   |
| Mode:Observations:Duration                 | $F_{(2,12)} = 0.16$   | .85       |            | .0003 |   |
| Mode:Distance:Duration                     | $F_{(2,12)} = 24.06$  | < .001    | *          | .01   |   |
| Observations:Distance:Duration             | $F_{(4,24)} = 2.67$   | .057      |            | .009  |   |
| Mode:Weight:Duration                       | $F_{(5,30)} = 6.69$   | < .001    | *          | .022  |   |
| Observations:Weight:Duration               | $F_{(10,60)} = 1.49$  | .17       |            | .008  |   |
| Distance:Weight:Duration                   | $F_{(10,60)} = 3.00$  | .004      | *          | .008  |   |
| Mode:Observations:Distance:Weight          | $F_{(20,120)} = 4.76$ | < .001    | *          | .026  |   |
| Mode:Observations:Distance:Duration        | $F_{(4,24)} = 0.90$   | .48       |            | .002  |   |
| Mode:Observations:Weight:Duration          | $F_{(10,60)} = 0.61$  | .8        |            | .004  |   |
| Mode:Distance:Weight:Duration              | $F_{(10,60)} = 4.19$  | < .001    | *          | .009  |   |
| Observations:Distance:Weight:Duration      | $F_{(20,120)} = 2.34$ | .002      | *          | .013  |   |
| Mode:Observations:Distance:Weight:Duration | $F_{(20,120)} = 1.54$ | .081      |            | .008  |   |

Significance of effects of CSSM configuration factors on Accuracy, using 216 CMf / CPf configurations.  
(2 modes, 3 observations, 3 distances, 6 weights, 2 durations.)
