# Supplementary material for: Computational State Space Models for Activity and Intention Recognition. A Feasibility Study
Source: PubMed Central journal article supplement (PMC4220990; doi:10.1371/journal.pone.0109381), 2014-11-05
Supplement: pone.0109381.s023.pdf [file pone.0109381.s023.pdf]

# S1 Notational conventions and abbreviations

For random variables  $X, Y$  with value domains  $\mathcal{X}, \mathcal{Y}$  and conditional density  $p(X|Y)$  we abbreviate  $p(X=x|Y=y)$  as  $p(x|y)$  with realizations  $x \in \mathcal{X}, y \in \mathcal{Y}$  in case the lower case realization names unambiguously determine the corresponding random variables. For some distributions explicit names are chosen such that, for instance,  $\varphi(x|y) := p(x|y)$  implies that  $\varphi(a, b) = p(X=a, Y=b)$ . Somewhat careless we say “the distribution  $p(X)$ ” when  $p(X)$  is really a density function.

A boolean expression has either the value 1 (logical true) or 0 (false). The Iverson bracket  $[\alpha]$  has the value 1 in case the logical statement  $\alpha$  is true, otherwise 0. The vector  $(a_1, \dots, a_n)$  is abbreviated as  $a_{1:n}$ .

Sometimes, an Iverson bracket  $[c = x]$  is used as distribution, where  $c$  is some constant and  $x \in \mathcal{X}$  ranges over a set of values. If  $\mathcal{X}$  is a finite set,  $[c = x]$  is simply a probability mass function. If  $\mathcal{X}$  is continuous,  $[c = x]$  represents a  $\delta$  distribution placed at  $c$ .

The notation  $(CI_{.95} = x, y)$  is used for reporting the confidence interval  $[x, y]$  at the .05  $\alpha$  level. Wilcoxon signed rank test is used for testing significant difference of accuracy between models or varying parameterizations, where  $(V_{(n)}, p < x)$  denotes the statistics and  $p$ -value for the Wilcoxon test with  $n$  pairs.

**Table 1.** Abbreviations and notations used in the article.

| Abbreviation | Meaning                                           |
|--------------|---------------------------------------------------|
| ANOVA        | analysis of variance                              |
| aLTS         | annotation LTS                                    |
| $CI_{.95}$   | 95% confidence interval                           |
| CSSM         | computational state space model                   |
| DBN          | dynamic Bayesian network                          |
| DTW          | dynamic time warping                              |
| HMM          | hidden Markov model                               |
| $F_{(a,b)}$  | $F$ statistic with $a$ and $b$ degrees of freedom |
| i.i.d        | independent and identically distributed           |
| iLTS         | inference LTS                                     |
| IMU          | inertial measurement unit                         |
| $IQR$        | interquartile range                               |
| JSD          | Jensen-Shannon distance                           |
| LTS          | labeled transition system                         |
| MAP          | maximum a-posteriori                              |
| MF           | marginal filter                                   |
| PF           | particle filter                                   |
| QDA          | quadratic discriminant analysis                   |
| rANOVA       | repeated measures ANOVA                           |
| $SD$         | standard deviation                                |
| SSM          | state space model                                 |
| $t_{(d)}$    | $t$ statistic with $d$ degrees of freedom         |
| $V_{(n)}$    | Wilcoxon signed rank statistic with $n$ pairs     |
