# Supplementary material for: Computational State Space Models for Activity and Intention Recognition. A Feasibility Study
Source: PubMed Central journal article supplement (PMC4220990; doi:10.1371/journal.pone.0109381), 2014-11-05
Supplement: pone.0109381.s024.pdf [file pone.0109381.s024.pdf]

## 1 S2 Computational state space models

2 This section provides a brief review of the pertinent notions of CSSMs from the perspective of intention  
3 recognition (IR) and activity recognition (AR). We draw on concepts of action languages [1], symbolic  
4 planning [2, p. 366], and plan recognition [3]. Our discussion of IR and AR is focused on the objective of  
5 introducing the probabilistic machinery of CSSMs; for a more general perspective on the field of IR we  
6 refer the reader to available surveys [4–7].

### 7 S2.1 Actions, states, intentions, plans

8 We consider dynamic systems whose behavior can be formally captured by the notion of labeled transition  
9 systems (LTS). An LTS is a triple  $(\mathcal{S}, \mathcal{A}, \rightarrow)$  where  $\mathcal{S}$  is a set of states,  $\mathcal{A}$  a set of labels (which we in  
10 this context usually call “actions”) and  $\rightarrow \subseteq \mathcal{S} \times \mathcal{A} \times \mathcal{S}$  a ternary relation, representing the labeled  
11 transitions. If for two states  $s, s' \in \mathcal{S}$  and an action  $a \in \mathcal{A}$  we have that  $(s, a, s') \in \rightarrow$ , we say that  $s'$   
12 is *reachable* from  $s$  by  $a$ , or  $s'$  is the result of applying  $a$  in  $s$ . This is written as  $s \xrightarrow{a} s'$ . If for a given  
13  $s \in \mathcal{S}$  and  $a \in \mathcal{A}$  there exists an  $s' \in \mathcal{S}$  such that  $s \xrightarrow{a} s'$ , we say that  $a$  is *applicable* to  $s$ , or that  $s$  fulfills  
14 the precondition of  $a$ . If for any pair  $(s, a)$  there exists at most one  $s'$  such that  $s \xrightarrow{a} s'$ , we say that  $a$   
15 is *deterministic*, resp. that  $a$  has deterministic effects. In this case we can consider  $a$  to be a function  
16 defined by  $s' = a(s) \iff s \xrightarrow{a} s'$ . If all actions are deterministic, the LTS itself is deterministic. For  
17 simplicity, we consider only LTS with deterministic effects (we will introduce nondeterminism later via  
18 the nondeterministic choice between the different actions that may be applicable to a state). Note that  
19  $\mathcal{S}$  and  $\mathcal{A}$  need not be finite.

20 A *goal* is a set of states. A *plan*  $l = (a_1, \dots, a_n)$  for a goal  $g \subseteq \mathcal{S}$  and an initial state  $s_0 \in \mathcal{S}$  is a  
21 finite sequence of actions  $a_i$  such that  $s_n \in g$  where  $s_n = a_n(\dots a_2(a_1(s_0))\dots)$ . We say that  $l$  *achieves*  
22  $g$ . Furthermore, we say that an agent executing a plan  $l$  that achieves a goal  $g$  has the *intention* to  
23 achieve  $g$ . Using this notion of intention we can say that intentions are isomorphic to goals. We can  
24 recognize an agent’s intentions by observing the agent to work on a plan known to achieve some goal  $g$   
25 (*intention recognition*). Informally, we refer to the number of alternative paths (between two states) as  
26 (local) “dispersion” of an LTS.

### 27 S2.2 Action languages and latently infinite LTS

28 It is easy to arrive at LTS where  $\mathcal{S}$  and  $\rightarrow$  are infinite, even though  $\mathcal{A}$  is finite – for instance by introducing  
29 states that represent counter values and actions that increment such counters (the natural numbers and  
30 the successor function are such an LTS). In the domain of intelligent assistive systems, protagonist  
31 activities such as setting a table by incrementally moving items from the kitchen to the dining room  
32 result in this counting behavior. Such LTS can not be represented by explicit enumeration of states  
33 and transitions. However, in case every action can be represented by an *algorithm*, defined in a suitable  
34 algorithmic language (which we call “computational action language”), then also these LTS have a finite  
35 representation. An action here can be considered a function that computes (generates) a resulting state  
36 from its origin state: the LTS graph is incrementally expanded during computation. As long as only  
37 a finite subset of states needs to be considered in a given intention recognition task, computations on  
38 such latently infinite systems remain feasible. Clearly, a computational action language – possibly Turing  
39 complete – is also helpful for providing a compact representation of a finite, yet bulky LTS.

40 Informally, a basic model for an action language can be defined as follow:

- 41 • There is a set of *variable names* and a set of *value domains* whose disjoint union describes the set  
42 of possible values.
- 43 • A state is a finite map of variable names to values. In unstructured, atomic state models, as used  
44 in HMMs, state values are opaque labels that only support to compare for identity. In order to

allow computations on states (such as generating a new state from a given state), state values have to provide a suitable algebraic structure, such as given by this slot-value model.

In assistive settings, structured states enable a straightforward mechanism for guidance in case of erroneous, unexpected, or ineffective behavior: planning mechanisms can readily be used for computing a route from the current state to the original goal state. This option is not available in unstructured state models. Here, contingency plans have to be enumerated explicitly.

- We assume that the language allows to write expressions that may refer to state variables. Let  $E$  be the set of all expressions. We write  $e(s)$  to denote the value that an expression  $e \in E$  takes on in the context of a state  $s \in S$  (that is: the value of  $e$  where the values of variables in  $e$  are taken from the state  $s$ ).
- An action  $a$  is defined by
  1. The precondition  $\pi_a$ : a boolean expression on state variables. If the value  $\pi_a(s)$  for a given state  $s$  is true, then we say that  $a$  is applicable to  $s$ . We write this as  $s \models \pi_a$ .
  2. The effect  $\epsilon_a$ : a finite map of variable names  $v_i$  to expressions  $e_i$ . If  $a$  is applied to a state  $s$ , a new state  $s'$  results from  $s$  by assigning the value of  $e_i(s)$  to each  $v_i$  and by copying the remaining mapping from  $s$ .

The STRIPS language [8] is a particularly simple instance of an action language (although not Turing complete), where add and delete lists of STRIPS actions effectively model the assignment of “true” or “false” to variables. PDDL 2.1 [9] is another example from the planning domain, supporting numerical expressions and infinite value domains of variables. Other examples are rule-based expert system languages such as CLIPS [10] or the production rule language of the ACT-R cognitive architecture [11], both Turing complete.

Action languages such as PDDL typically support *action schemata* – action templates that contain template variables from which actions can be constructed by instantiating these template variables with domain values. A single schema represents the set of actions that can be created by instantiating its variables. To differentiate actions – which have no template parameters – from action schemata, the former are sometimes called “ground actions”. The unique label of a ground action  $a$  created from a schema is the tuple consisting of schema name and the parameter values used for instantiation.

### S2.3 CSSMs: Probabilistic interpretation

State space models (SSMs) [12] are a general class of probabilistic models where a sequence of observations is explained by the sequential evolution of a hidden state variable. Let  $\mathcal{X}$  be some set of states, let  $X_{1:t}$  be a sequence of random variables with value domain  $\mathcal{X}$ . Furthermore, let  $\mathcal{Y}$  be a set of observations and  $Y_{1:t}$  a sequence of random variables with value domain  $\mathcal{Y}$ . Then the joint distribution  $p(x_{1:t}, y_{1:t})$  can be described by an SSM if it recursively (over time  $t$ ) factorizes into a *transition model*  $p(x_t | x_{t-1})$  and an *observation model*  $p(y_t | x_t)$ , that is  $p(x_{1:t}, y_{1:t}) = p(y_1 | x_1) p(x_1) \prod_{i=2}^t (p(y_i | x_i) p(x_i | x_{i-1}))$ . The SSM is stationary if  $p(x_t | x_{t-1}) = p(x' | x)$  and  $p(y_t | x_t) = p(y | x)$  for random variables  $X', X$  with value domain  $\mathcal{X}$  and  $Y$  with value domain  $\mathcal{Y}$ . Hidden Markov models, Kalman filters, and dynamic Bayesian networks are instances of SSMs that use specific function families for representing the transition model and the observation model. Given a sequence of observations  $y_{1:t}$  with  $y_i \in \mathcal{Y}$ , we can employ the combination of prediction (computing the next state based on past observations) and correction (computing the current state based on the current observation and the prediction) for recursive state estimation, as given by the two equations

$$p(x_t | y_{1:t-1}) = \int_{x_{t-1} \in \mathcal{X}} p(x_t | x_{t-1}) p(x_{t-1} | y_{1:t-1}) dx_{t-1} \quad (1)$$

$$p(x_t | y_{1:t}) = \frac{p(y_t | x_t) p(x_t | y_{1:t-1})}{p(y_t | y_{1:t-1})} \quad (2)$$

87 where  $p(x_t | y_{1:t})$  is known as *marginal filtering distribution* (correspondingly,  $p(x_{1:t} | y_{1:t})$  is the joint  
 88 filtering distribution, as it jointly estimates the whole state series  $x_{1:t}$ ). The underlying idea of *com-*  
 89 *putational* state space models (CSSMs) is to use computational action languages for representing the  
 90 transition distribution. This approach is interesting when the process under observation can be consid-  
 91 ered as performing some kind of sequential “computation”, including such phenomena as goal directed  
 92 behavior of human protagonists.

93 A CSSM is defined by an LTS  $(\mathcal{S}, \mathcal{A}, \rightarrow)$  with a set of goals  $\mathcal{G}$  as follows. One defines  $\mathcal{X} := \mathcal{S} \times \mathcal{A} \times \mathcal{G}$   
 94 and  $X := (S, A, G)$ . The transition model becomes:

$$\begin{aligned} p(x' | x) &= p(s', a', g' | x) \\ &= p(s' | a', g', x) p(a' | g', x) p(g' | x) \\ &= p(s' | a', s) p(a' | g', s, a) p(g' | x), \end{aligned}$$

95 where the last step reflects two simplifying design assumptions: (i) The LTS action  $a'$  selected for gen-  
 96 erating the new LTS state  $s'$  from the previous state  $s$  does not depend on the previous goal  $g$ . (ii) The  
 97 new LTS state  $s'$  depends only on the previous LTS state  $s$  and the action  $a'$  applied to this state. Specif-  
 98 ically, if the underlying LTS is deterministic, then  $p(s' | a', s) = [s' = a'(s)]$ . (These assumptions are not  
 99 strictly necessary, but they simplify the resulting model structure.) We call  $\gamma(a' | g', s, a) := p(a' | g', s, a)$   
 100 the action selection distribution. If the underlying LTS is deterministic and if goals are fixed, then all  
 101 nondeterminism is solely introduced by the action selection distribution, which models the protagonist’s  
 102 freedom of choice.

103 As the probabilistic state variable  $X$  contains both the LTS state  $S$  and the LTS action  $A$ , an  
 104 observation model  $p(y | x) \equiv p(y | s, a, g)$  may be built on observations of LTS states, of LTS actions,  
 105 or combinations of both. One often has the assumption that the observations factor into independent  
 106 state and action observations  $Y = (W, Z)$ , so that state observations  $W$  only depend on the state  $S$  and  
 107 action observations  $Z$  only depend on the action  $A$ . This leads to the additional simplifying independence  
 108  $p(y | x) \equiv p(w, z | s, a, g) = p(w | s) p(z | a)$ . This has been used for example by [13]. The availability of  
 109 state observations for inference is an interesting aspect of CSSMs, as it is no longer necessary to assume  
 110 that protagonist actions can be directly observed. At the same time, state estimation via the filtering  
 111 equation allows to make statements about  $S$  even in case only action observations are available.

## 112 S2.4 Action selection

113 The action selection distribution  $\gamma$  models the non-deterministic behavior of protagonists in the case that  
 114 multiple actions are applicable to a given situation. Specifically for human protagonists, this behavior is  
 115 potentially influenced by a large set of factors [14] that are current target of research on human behavior.  
 116 They encompass decision theoretic quantities, such as an “action’s utility” in reaching the goal from the  
 117 given state (being used, for instance, in the ACT-R cognitive architecture [11]), as well as situation-based  
 118 conflict resolution strategies from the domain of rule-based expert systems, such as “specificity” [15].

119 Independent of the specific number and nature of the different factors, they can be combined using a  
 120 log-linear model [16], so that the action selection distribution  $\gamma$  is given by

$$\gamma(a' | g', s, a) \propto \exp \left( \sum_{i \in \mathcal{I}} \lambda_i f_i(a', g', s, a) \right) \quad (3)$$

121 where the functions  $f_i : \mathcal{A} \times \mathcal{G} \times \mathcal{S} \times \mathcal{A} \rightarrow \mathbb{R}$  represent the different factors and the  $\lambda_i \in \mathbb{R}$  their respective  
 122 weights, for some index set  $\mathcal{I}$ . For instance, let  $\delta_{\mathcal{A}}(s, g)$  be the distance (or, more general, the cost of the  
 123 optimal path) from state  $s$  to goal  $g$  given the action set  $\mathcal{A}$  and  $w(s, a', s')$  the length (cost) associated with  
 124 the LTS edge  $s \xrightarrow{a'} s'$ . Define  $Q_{g'}(a', s) := w(s, a', a'(s)) + \delta(a'(s), g')$ . Then the action selection model  
 125 given by [17], where  $\gamma(a' | g', s, a) \propto \exp(\beta Q_{g'}(a', s))$  (adapted from eq. (8) in [17]) naturally arises as

126 special case of (3) by setting  $\mathcal{I} = \{\delta\}$  and  $f_\delta(a', g', s, a) := Q_{g'}(a', s)$  as well as  $\lambda_\delta := \beta$ . Likewise, we  
 127 can incorporate concepts such as “specificity”, a function  $\sigma : \mathcal{A} \times \mathcal{S} \rightarrow \mathbb{R}$ , where  $\sigma(a', s)$  quantifies how  
 128 specific the precondition of  $a'$  is for  $s$ , as another factor of (3). Restricting action selection to only those  
 129 actions that are applicable to  $s$ , where  $s \models \pi_{a'}$ , can be seen as very simple special case of specificity. One  
 130 observes that  $[s \models \pi_{a'}] = \exp(f_\pi(a', g', s, a))$  where

$$f_\pi(a', g', s, a) := \begin{cases} 0, & \text{if } s \models \pi_{a'} \\ -\infty, & \text{otherwise.} \end{cases}$$

131 So this restriction can easily be embedded as another feature into (3), with weight  $\lambda_\pi := 1$ .

132 We will therefore assume that (3) represents the basic functional structure of the action selection  
 133 distribution in CSSMs. In the face of a large set of factors not yet fully understood, the interesting  
 134 aspect of using the log-linear model is that it allows (i) factors  $f_i$  that interact in arbitrary ways, and  
 135 (ii) the estimation of the factor weights  $\lambda_i$  from training data. Thus, for the purpose of using CSSMs,  
 136 it is not necessary to wait for research to arrive at a final set of independent factors governing human  
 137 action selection.

## 138 References

- 139 1. Gelfond M, Lifschitz V (1998) Action languages. Linköping Electronic Articles in Computer and  
 140 Information Science 3.
- 141 2. Russell S, Norvig P (2010) Artificial Intelligence – A Modern Approach. Prentice Hall, third  
 142 edition.
- 143 3. Kautz HA (1991) A formal theory of plan recognition and its implementation. In: Brachman RJ,  
 144 Allen JF, Kautz HA, Pelavin RN, Tenenber JD, editors, Reasoning about Plans, San Francisco,  
 145 CA, USA: Morgan Kaufmann Publishers Inc. pp. 69–126.
- 146 4. Aggarwal JK, Ryoo MS (2011) Human activity analysis: A review. ACM Computing Surveys 43:  
 147 16:1–16:43.
- 148 5. Chen L, Hoey J, Nugent C, Cook D, Yu Z (2012) Sensor-based activity recognition. IEEE Trans-  
 149 actions on Systems, Man, and Cybernetics, Part C: Applications and Reviews 42: 790–808.
- 150 6. Han TA, Pereira LM (2013) State-of-the-art of intention recognition and its use in decision making.  
 151 AI Communications 26: 237–246.
- 152 7. Sadri F (2011) Logic-based approaches to intention recognition. In: Chong NY, Mastrogiovanni F,  
 153 editors, Handbook of Research on Ambient Intelligence: Trends and Perspectives, IGI Global. pp.  
 154 346–375.
- 155 8. Fikes RE, Nilsson NJ (1971) Strips: A new approach to the application of theorem proving to prob-  
 156 lem solving. In: Proceedings of the second International Joint Conference on Artificial Intelligence  
 157 (IJCAI). San Francisco, CA, USA: Morgan Kaufmann Publishers Inc., pp. 608–620.
- 158 9. Fox M, Long D (2003) PDDL2.1: An extension to PDDL for expressing temporal planning domains.  
 159 Journal of Artificial Intelligence Research (JAIR) 20: 61–124.
- 160 10. Giarratano JC, Riley GD (2004) Expert Systems: Principles and Programming. Boston, MA:  
 161 Course Technology, fourth edition.

- 162 11. Anderson JR, Bothell D, Byrne MD, Douglass S, Lebiere C, et al. (2004) An integrated theory of  
163 the mind. *Psychological Review* 111: 1036–1060.
- 164 12. Koller D, Friedman N (2009) *Probabilistic Graphical Models*. Cambridge, MA: MIT Press.
- 165 13. Hoey J, Plötz T, Jackson D, Monk A, Pham C, et al. (2011) Rapid specification and automated  
166 generation of prompting systems to assist people with dementia. *Pervasive and Mobile Computing*  
167 7: 299–318.
- 168 14. Prescott TJ, Bryson JJ, Seth AK (2007) Theme issue ‘modelling natural action selection’. *Philosophical*  
169 *Transactions of the Royal Society B – Biological Sciences* 362: 1521-1721.
- 170 15. Krüger F, Yordanova K, Burghardt C, Kirste T (2012) Towards creating assistive software by  
171 employing human behavior models. *Journal of Ambient Intelligence and Smart Environments* 4:  
172 209–226.
- 173 16. Berger A, Pietra SD, Pietra VD (1996) A maximum entropy approach to natural language pro-  
174 cessing. *Computational Linguistics* 22: 40–71.
- 175 17. Ramírez M, Geffner H (2011) Goal recognition over POMDPs: Inferring the intention of a POMDP  
176 agent. In: *Proceedings of the 22nd International Joint Conference on Artificial Intelligence (IJCAI)*.  
177 Barcelona, Spain, pp. 2009-2014.
