# Supplementary material for: Computational State Space Models for Activity and Intention Recognition. A Feasibility Study
Source: PubMed Central journal article supplement (PMC4220990; doi:10.1371/journal.pone.0109381), 2014-11-05
Supplement: pone.0109381.s025.pdf [file pone.0109381.s025.pdf]

## 1 S3 Annotation procedure and annotation ontology

### 2 S3.1 Underlying rationale.

3 Objective of annotation is to provide a target label  $\ell_t$  for every observation  $y_t$  such that methods for  
4 supervised learning can be applied. In addition, comparing target values with the values estimated from  
5 observation data is used for quantifying the performance of the estimation procedure. These labels are  
6 called “ground truth”, as they conceptually provide a symbolic representation of the true state of the  
7 world at time  $t$ . However, in reality, labels are a finite set  $\mathcal{L} := \{\ell_1, \dots, \ell_n\}$  where besides the equality  
8 relation no other algebraic structure on  $\mathcal{L}$  exists. In current annotation practice, each label value  $\ell \in \mathcal{L}$  is  
9 accompanied by some textual description (such as “take knife”), that supports the annotator in selecting  
10 what label  $\ell_t$  to attach to an observation  $y_t$ . This description looks like a symbolic representation – but  
11 this often is an illusion: There is no formal set of constraints on the structure of label sequences that  
12 would enforce them to reflect constraints on causality implied by the labels’ textual descriptions. The  
13 language of formally valid label sequences is  $\mathcal{L}^*$  itself.

14 There is nothing that denies an annotator to produce the label sequence “go from A to B”, “wait”, “go  
15 from C to D”. Under the natural interpretation of these textual labels, such annotations represent acausal  
16 behavior. Instances of this phenomenon can readily be found in the data provided by [1–3]. As long  
17 as models do not aim at exploiting the causal structure of behavior, such annotation oddities are no  
18 problem. However, in order to use CSSMs, we must rely on “ground truth” to indeed represent a true  
19 causal sequence of states and actions. This therefore requires that already the annotation is based on  
20 a formal model of causal behavior. Causality not available in the annotation model can not be reliably  
21 exploited in an inference model. The consequence of this is that already the annotations must be based on  
22 an LTS, the *annotation LTS* (aLTS). A second consequence is that the algebraic refinement relations that  
23 hold between the aLTS and the CSSM LTS (the *inference LTS*, iLTS) determine the CSSM’s capability  
24 to correctly estimate annotation sequences – for instance, unless the iLTS is a refinement of the aLTS,  
25 the CSSM model will not be able to differentiate between certain states and actions that are discernible  
26 in the aLTS. Thus, from a certain viewpoint, CSSM model development already begins at the annotation  
27 stage.

28 In addition to these considerations, annotations should be agnostic to the capabilities of the underlying  
29 sensors. Some researchers select the annotation dictionary based on the expected capability of the sensor  
30 used in the experiment to identify such actions or states [4–6]. For instance, temperature sensors in  
31 the shower, pressure sensors in the bed, and reed switches in doors strongly correlate with annotated  
32 activities showering, sleeping, and opening / closing. This approach may seem convenient at first glance,  
33 but was rejected for two reasons: (i) it exaggerates the resulting model’s discriminative capabilities (as  
34 “difficult” things are simply dropped from the target set), and (ii) it is in fundamental disagreement with  
35 the “philosophy” of CSSMs, as the resulting annotation dictionary – and the data set annotations – is  
36 not reusable for other sensor modalities.

### 37 S3.2 aLTS development method and data set annotation.

38 For aLTS model development, a simplified process of model driven engineering [7] was used to combine  
39 information from the empirical samples with the background knowledge of the domain expert.

- 40 1. From the video log the atomic domain objects and their state variables were identified by the  
41 domain expert. All physical entities were considered as domain objects that were independently  
42 manipulated by the protagonist (including the protagonist). Roughly, objects  $x, y$  are independent,  
43 if a specific manipulation of  $x$  does not imply another specific manipulation of  $y$  and vice versa.  
44 Although this is not an exact definition it was sufficient for the purpose of this study.

45 A deliberate design choice was to avoid aLTS state variables with continuous domains, as this would  
46 introduce another source of variance into the model that would further increase the difficulty of

47 identifying the different causes of model performance. Therefore, protagonists would be `hungry` or  
 48 `¬hungry`, protagonist locations would be elements of some (small) finite set, glasses would be `filled`  
 49 or `¬filled`, etc.

50 2. Atomic actions were identified from the resulting state sequences. Atomic actions are those actions  
 51 that do not contain other actions that have an effect on the state of domain objects. Thus, the  
 52 notion of atomicity is essentially implied by the granularity of the aLTS state model. Actions were  
 53 identified from the video log by assigning an action to every frame sequence that would delimit a  
 54 state change to an aLTS object.

55 3. aLTS actions were abstracted into action schemata by (a) identifying classes of domain objects and  
 56 (b) classes of domain actions such that all elements of an aLTS action class could be generated  
 57 from the corresponding action schema by instantiating the parameters of this action schema with  
 58 elements of suitable domain object classes. These action schemata would represent the causality of  
 59 the domain using a precondition–effect model.

60 For the purpose of this study, natural language was chosen as source of intuitive prior knowledge,  
 61 by allowing the aLTS designer to select a small set of verbs (such as `take`) as labels for the identified  
 62 action schemata. Following, these aLTS action schema labels are referred to as *action classes*.

63 Typically, in this abstraction process a set of state transitions such as  $\{(x_{t-1}=1 \mapsto x_t:=1), (x_{t-1}=2 \mapsto$   
 64  $x_t:=4), (x_{t-1}=3 \mapsto x_t:=9)\}$  would be represented by a single action such as  $x_t := x_{t-1}^2$ , replacing  
 65 explicit values with a *computation* that generates the desired values as needed. These computational  
 66 representations are a powerful mechanism for generalization, that extends the scope of the model  
 67 towards an infinite range of states. Inventing computational actions requires inductive reasoning; it  
 68 adds knowledge not deducible from the training data. Usually, this will be prior knowledge available  
 69 to the aLTS designer.

70 4. Finally, the annotation sequences defined for the data sets were checked against the aLTS actions  
 71 to ensure that each annotation sequence would be a valid path through the LTS defined by the  
 72 aLTS actions.

### 73 S3.3 Complex interleaving.

74 Although many actions could be considered as deterministic, non-deterministic effects were used to re-  
 75 solve some non-trivial interleaving patterns. For instance, consider the interleaved process of eating and  
 76 drinking. In case no other actions are allowed to intervene, this can be summarized by the following  
 77 regular grammar:

$$((\text{take}(\text{spoon},\text{table}), \text{eat}, \text{put}(\text{spoon},\text{table})) \mid (\text{take}(\text{glass},\text{table}), \text{drink}, \text{put}(\text{glass},\text{table})))^*$$

78 Clearly, the last `eat` (resp. `drink`) will achieve `¬hungry` (resp. `¬thirsty`). To model this behavior, the  
 79 `¬hungry` effect of `eat` was considered to be a probabilistic effect, one of the preconditions of `eat` being  
 80 `hungry`. Note that the transition from `eat` to `drink` and vice versa requires certain intervening actions  
 81 (e.g., `put(spoon,table)`, `take(glass,table)`). The interleaving of “eating” and “drinking” therefore can not  
 82 be handled by a simple interleaved execution of two parallel actions `eat` and `drink` (as proposed – for a  
 83 different scenario – in [8]). For the same reason, the duration of `eat` can not be represented by a single  
 84 durative PDDL action.

85 Implementationally, a single action  $a$  with precondition  $\pi_a$  and a finite distribution over  $n$  probabilistic  
 86 effects  $\epsilon_a^{(i)}$  having probability  $p_i$  was approximated by a set of  $n$  actions  $a_i$  with single preconditions  
 87  $\pi_{a_i} = \pi_a$  and deterministic effects  $\epsilon_{a_i} := \epsilon_a^{(i)}$ , where the relative probability of selecting  $a_i$  depends on  $p_i$ .

## References

- 88 1. Regneri M, Rohrbach M, Wetzel D, Thater S, Schiele B, et al. (2013) Grounding action descriptions  
89 in videos. Transactions of the Association for Computational Linguistics (TACL) 1: 25–36.  
90
- 91 2. Spriggs E, de La Torre F, Hebert M (2009) Temporal segmentation and activity classification from  
92 first-person sensing. In: IEEE Workshop on Egocentric Vision, in conjunction with CVPR 2009.  
93 Miami, Florida, USA, pp. 17–24.
- 94 3. de la Torre F, Hodgins J, Montano J, Valcarcel S, Forcada R, et al. (2009) Guide to the carnegie  
95 mellon university multimodal activity (CMU-MMAC) database. Technical Report CMU-RI-TR-08-  
96 22, Robotics Institute, Carnegie Mellon University.
- 97 4. Donnelly M, Magherini T, Nugent C, Cruciani F, Paggetti C (2011) Annotating sensor data to  
98 identify activities of daily living. In: Abdulrazak B, Giroux S, Bouchard B, Pigot H, Mokhtari M,  
99 editors, Toward Useful Services for Elderly and People with Disabilities, Springer Berlin Heidelberg,  
100 volume 6719 of *Lecture Notes in Computer Science*. pp. 41–48.
- 101 5. van Kasteren TLM, Kröse BJA (2009) A sensing and annotation system for recording datasets in  
102 multiple homes. In: Proceedings of the 27th Annual Conference on Human Factors and Computing  
103 Systems. Boston, USA, pp. 4763–4766.
- 104 6. Stikic M, Van Laerhoven K (2007) Recording housekeeping activities with situated tags and wrist-  
105 worn sensors: Experiment setup and issues encountered. In: Proceedings of the first International  
106 Workshop on Wireless Sensor Networks for Health Care (WSNHC). Braunschweig, Germany.
- 107 7. Fondement F, Silaghi R (2004) Defining model driven engineering processes. In: Proceedings of  
108 the third Workshop in Software Model Engineering Satellite workshop at the seventh International  
109 Conference on the UML. Lisabon, Portugal.
- 110 8. Shi Y, Huang Y, Minnen D, Bobick A, Essa I (2004) Propagation networks for recognition of partially  
111 ordered sequential action. In: Proceedings of the IEEE Computer Society Conference on Computer  
112 Vision and Pattern Recognition (CVPR). Washington DC, USA, pp. 862–869.
